# Supplementary material for: A theoretical study about the excited state intermolecular proton transfer mechanisms for 2-phenylimidazo[4,5-b]pyridine in methanol solvent
Source: Royal Society of Chemistry journal article supplement (doi:10.1039/c7ra05976k), 2017-01-01
Supplement: c7ra05976k1.pdf [file c7ra05976k1.pdf]

## Supporting Information

### **A theoretical study about excited state intermolecular proton transfer mechanisms for 2-phenylimidazo[4,5-b]pyridine in methanol solvent**

Dapeng Yang<sup>1,2,\*†</sup>, Jinfeng Zhao<sup>2,†</sup>, Min Jia<sup>1</sup>, Xiaoyan Song<sup>1</sup>

1.College of Mathematics and Information Science, North China University of Water Resources and Electric Power, Zhengzhou 450046, China

2.State Key Laboratory of Molecular Reaction Dynamics, Theoretical and Computational Chemistry, Dalian Institute of Chemical Physics, Chinese Academy of Sciences, Dalian 116023, China

Corresponding authors: Dapeng Yang, email: [dpyang\\_ncwu@163.com](mailto:dpyang_ncwu@163.com).

†These authors contributed equally.

**The optimized Cartesian Coordinates of PIP coupling with MeOH structures in different electronic states are provided below:**

**S<sub>0</sub>-state PIP-MeOH (-742.96900164 a.u.):**

|   | <b>X</b>    | <b>Y</b>    | <b>Z</b>    |
|---|-------------|-------------|-------------|
| C | 1.60971500  | -0.28729000 | -0.09256000 |
| C | 1.30043500  | -1.66043600 | 0.02783900  |
| C | 2.36378400  | -2.55663900 | 0.08209700  |
| C | 3.64308900  | -2.01173100 | 0.01415900  |
| C | 3.82577600  | -0.62827100 | -0.10319100 |
| C | -0.57477800 | -0.60999200 | -0.02415100 |
| H | 2.20476400  | -3.62365600 | 0.17314900  |
| H | 4.51405000  | -2.65216300 | 0.05136700  |
| H | 4.82585100  | -0.21517700 | -0.15476900 |
| H | 0.31540700  | 1.36801100  | -0.18756200 |
| N | 2.81935400  | 0.25558600  | -0.15858300 |
| N | -0.06672000 | -1.82732800 | 0.06807300  |
| C | -2.00703900 | -0.30264800 | -0.01985500 |
| C | -2.92734100 | -1.33002900 | 0.22906600  |
| C | -2.48542000 | 0.99168300  | -0.26086000 |
| C | -4.28979000 | -1.06675600 | 0.23828200  |
| H | -2.55932300 | -2.32973900 | 0.41484900  |
| C | -3.85088400 | 1.25055300  | -0.25013800 |
| H | -1.80268200 | 1.80581000  | -0.46822900 |
| C | -4.75744100 | 0.22428600  | -0.00038100 |
| H | -4.98963300 | -1.86973900 | 0.43356200  |
| H | -4.20592600 | 2.25570000  | -0.43971900 |
| N | 0.39985000  | 0.35713400  | -0.12512100 |
| C | 2.00046300  | 3.89621000  | 0.59175000  |
| H | 1.22161800  | 4.65428400  | 0.51812700  |
| H | 1.99140700  | 3.48438300  | 1.60596300  |
| H | 2.96845200  | 4.37469400  | 0.41456700  |
| O | 1.72205700  | 2.89774000  | -0.39098400 |
| H | 2.38959300  | 2.18594800  | -0.32380000 |
| H | -5.82084500 | 0.42834600  | 0.00744900  |

**S<sub>1</sub>-state PIP-MeOH (-742.83680708 a.u.):**

|   | <b>X</b>   | <b>Y</b>    | <b>Z</b>    |
|---|------------|-------------|-------------|
| C | 1.60144500 | -0.27175300 | -0.09160900 |
| C | 1.26608600 | -1.67437300 | 0.05061900  |
| C | 2.34887200 | -2.59207900 | 0.11737400  |
| C | 3.61875700 | -2.04145300 | 0.03965600  |

|   |             |             |             |
|---|-------------|-------------|-------------|
| C | 3.81490500  | -0.65268200 | -0.09847200 |
| C | -0.60403400 | -0.56865700 | -0.01652700 |
| H | 2.18244300  | -3.65531200 | 0.22286800  |
| H | 4.49416000  | -2.67631100 | 0.08359500  |
| H | 4.82035500  | -0.25428600 | -0.15656500 |
| H | 0.35557900  | 1.39485300  | -0.22195800 |
| N | 2.81390900  | 0.25894400  | -0.16674700 |
| N | -0.05321500 | -1.83978200 | 0.09466900  |
| C | -1.96928300 | -0.28693800 | -0.01281400 |
| C | -2.91989900 | -1.36414100 | 0.11593900  |
| C | -2.48726800 | 1.05136700  | -0.13403700 |
| C | -4.26944000 | -1.10664700 | 0.12059000  |
| H | -2.54430500 | -2.37339400 | 0.20806800  |
| C | -3.84256400 | 1.27592100  | -0.12627400 |
| H | -1.81133300 | 1.89055600  | -0.23386000 |
| C | -4.75339600 | 0.20891600  | 0.00026100  |
| H | -4.96988800 | -1.92734400 | 0.21810100  |
| H | -4.21601000 | 2.28848300  | -0.21892800 |
| N | 0.41538800  | 0.38299400  | -0.13109100 |
| C | 1.99882500  | 3.91058800  | 0.53788900  |
| H | 1.21558900  | 4.66249600  | 0.45030800  |
| H | 1.98371200  | 3.50734500  | 1.55535300  |
| H | 2.96515100  | 4.39328400  | 0.36412400  |
| O | 1.73562300  | 2.90123200  | -0.43860600 |
| H | 2.40759000  | 2.19483400  | -0.36033700 |
| H | -5.81863700 | 0.40142800  | 0.00468500  |

**S<sub>0</sub>-state PIP-MeOH-PT (-742.96298024 a.u.):**

|   | X           | Y           | Z           |
|---|-------------|-------------|-------------|
| C | 1.54715200  | -0.23372200 | -0.08064400 |
| C | 1.33499100  | -1.64196000 | 0.05395100  |
| C | 2.42995500  | -2.48639700 | 0.11535800  |
| C | 3.70896100  | -1.91113100 | 0.04185700  |
| C | 3.87153500  | -0.54559200 | -0.08824500 |
| C | -0.52734700 | -0.60972100 | -0.01365200 |
| H | 2.31295300  | -3.55810900 | 0.21637500  |
| H | 4.59159400  | -2.53256500 | 0.08598100  |
| H | 4.83806700  | -0.06920700 | -0.14801200 |
| H | 0.96455100  | 2.26942900  | -0.34184100 |
| N | 2.79656100  | 0.27447400  | -0.14863700 |
| N | -0.01540000 | -1.84467800 | 0.09395100  |
| C | -1.97241700 | -0.35095000 | -0.01362000 |
| C | -2.88228200 | -1.41011100 | 0.11242400  |

|   |             |             |             |
|---|-------------|-------------|-------------|
| C | -2.46913500 | 0.95322800  | -0.13916100 |
| C | -4.24999400 | -1.16912600 | 0.11249300  |
| H | -2.50348600 | -2.41848200 | 0.21001500  |
| C | -3.83845100 | 1.19084900  | -0.13878400 |
| H | -1.77541900 | 1.77693700  | -0.23705200 |
| C | -4.73437100 | 0.13178800  | -0.01316500 |
| H | -4.94113400 | -1.99740300 | 0.21079100  |
| H | -4.20727300 | 2.20459000  | -0.23676700 |
| N | 0.38345000  | 0.41561100  | -0.12352700 |
| C | 1.60678900  | 3.92841100  | 0.53365600  |
| H | 0.71002500  | 4.53224500  | 0.36749000  |
| H | 1.58263200  | 3.53327300  | 1.55398800  |
| H | 2.48082200  | 4.56989700  | 0.42893000  |
| O | 1.71978300  | 2.88599200  | -0.43755600 |
| H | 2.88512600  | 1.29219300  | -0.24372700 |
| H | -5.80132400 | 0.31802800  | -0.01304900 |

**S<sub>1</sub>-state PIP-MeOH-PT (-742.83857944 a.u.):**

|   | X           | Y           | Z           |
|---|-------------|-------------|-------------|
| C | 1.53747800  | -0.22249600 | -0.09163800 |
| C | 1.31841100  | -1.63886500 | 0.05854200  |
| C | 2.43543300  | -2.52492200 | 0.12905500  |
| C | 3.69635900  | -1.93535100 | 0.04586300  |
| C | 3.87281400  | -0.56050900 | -0.09891900 |
| C | -0.55012900 | -0.57206700 | -0.01728400 |
| H | 2.30828900  | -3.59253500 | 0.24017900  |
| H | 4.58858500  | -2.54510300 | 0.09254100  |
| H | 4.85078000  | -0.10704000 | -0.16263600 |
| H | 0.96653800  | 2.29851000  | -0.35743900 |
| N | 2.80844500  | 0.29617700  | -0.16930500 |
| N | 0.00509600  | -1.84876500 | 0.10492900  |
| C | -1.93970000 | -0.34269100 | -0.01566000 |
| C | -2.85939800 | -1.43490900 | 0.11814800  |
| C | -2.48004100 | 0.97731200  | -0.14804400 |
| C | -4.21716800 | -1.20914500 | 0.11729400  |
| H | -2.46112900 | -2.43453300 | 0.21911100  |
| C | -3.84050300 | 1.17826000  | -0.14651600 |
| H | -1.79978200 | 1.81115900  | -0.24996700 |
| C | -4.72526900 | 0.09294400  | -0.01465700 |
| H | -4.90075900 | -2.04306500 | 0.21907800  |
| H | -4.23609800 | 2.18135700  | -0.24786400 |
| N | 0.39568900  | 0.43570700  | -0.13881000 |
| C | 1.56787700  | 3.93945800  | 0.57030100  |

|   |             |            |             |
|---|-------------|------------|-------------|
| H | 0.64447800  | 4.51491800 | 0.45544100  |
| H | 1.58725500  | 3.50066800 | 1.57294400  |
| H | 2.41340300  | 4.61924200 | 0.47211200  |
| O | 1.69488300  | 2.94558400 | -0.44814800 |
| H | 2.91245600  | 1.30595000 | -0.27020900 |
| H | -5.79466800 | 0.26184700 | -0.01470300 |

**S<sub>0</sub>-state PIP-2MeOH (-858.76169881 a.u.):**

|   | X           | Y           | Z           |
|---|-------------|-------------|-------------|
| C | 1.22050900  | -0.97378700 | -0.07108200 |
| C | 0.67559400  | -2.27443700 | 0.05168100  |
| C | 1.55849200  | -3.34733900 | 0.11593400  |
| C | 2.91564200  | -3.04539200 | 0.05382600  |
| C | 3.34349000  | -1.71944700 | -0.06942500 |
| C | -0.98266300 | -0.91494200 | -0.02191600 |
| H | 1.20654000  | -4.36696000 | 0.20915200  |
| H | 3.65654000  | -3.83219900 | 0.09818000  |
| H | 4.40145500  | -1.49252100 | -0.12049800 |
| H | 0.19371600  | 0.90153600  | -0.15154000 |
| N | 2.51295600  | -0.66808300 | -0.13390000 |
| N | -0.69866700 | -2.20241000 | 0.07999900  |
| C | -2.34064900 | -0.36403900 | -0.04352000 |
| C | -3.42033100 | -1.18348400 | 0.31266000  |
| C | -2.58953700 | 0.96137900  | -0.42342300 |
| C | -4.71627400 | -0.68692900 | 0.29222400  |
| H | -3.22880000 | -2.20673800 | 0.60573500  |
| C | -3.88970400 | 1.45318600  | -0.44194500 |
| H | -1.77533200 | 1.61128600  | -0.71821300 |
| C | -4.95632100 | 0.63327100  | -0.08444400 |
| H | -5.54153400 | -1.32973800 | 0.57250000  |
| H | -4.06914300 | 2.47837400  | -0.74085500 |
| N | 0.14302600  | -0.12772600 | -0.11682900 |
| C | 0.29992400  | 3.56619400  | 0.80300700  |
| H | -0.78090000 | 3.60589000  | 0.93219900  |
| H | 0.75248200  | 3.22693200  | 1.73967500  |
| H | 0.66077500  | 4.57400400  | 0.57977000  |
| O | 0.57715500  | 2.66914300  | -0.27532700 |
| H | 1.55348400  | 2.60082900  | -0.39432200 |
| C | 4.26084700  | 2.50054600  | 0.26820500  |
| H | 5.20903800  | 2.01310600  | 0.02428400  |
| H | 4.36820100  | 3.57114300  | 0.09800500  |
| H | 4.04018200  | 2.33434200  | 1.32707000  |
| O | 3.20741000  | 2.02926500  | -0.57455500 |

|   |             |            |             |
|---|-------------|------------|-------------|
| H | 3.06937500  | 1.06288900 | -0.41775200 |
| H | -5.96791100 | 1.01942600 | -0.09990400 |

**S<sub>1</sub>-state PIP-2MeOH (-858.62936938 a.u.):**

|   | <b>X</b>    | <b>Y</b>    | <b>Z</b>    |
|---|-------------|-------------|-------------|
| C | 1.17202500  | -0.97305700 | -0.05525200 |
| C | 0.56934800  | -2.28499600 | 0.09333100  |
| C | 1.44381300  | -3.40188700 | 0.17773400  |
| C | 2.79879600  | -3.12052500 | 0.10632700  |
| C | 3.26862100  | -1.80209300 | -0.04348400 |
| C | -1.04486500 | -0.83893200 | 0.00109200  |
| H | 1.06364600  | -4.40786400 | 0.29054400  |
| H | 3.52901400  | -3.91737400 | 0.16249700  |
| H | 4.33366600  | -1.61386200 | -0.10112300 |
| H | 0.23487400  | 0.92756200  | -0.14823300 |
| N | 2.47218900  | -0.70707900 | -0.12671900 |
| N | -0.75601100 | -2.19090900 | 0.13068300  |
| C | -2.33155600 | -0.30185500 | -0.04194100 |
| C | -3.47313600 | -1.16903500 | 0.11442500  |
| C | -2.57892600 | 1.10246800  | -0.24390200 |
| C | -4.74765600 | -0.65676000 | 0.08101200  |
| H | -3.30061500 | -2.22566700 | 0.26266400  |
| C | -3.86596500 | 1.58294800  | -0.27423500 |
| H | -1.74953500 | 1.78257600  | -0.38792800 |
| C | -4.96687800 | 0.71964200  | -0.11103100 |
| H | -5.59453400 | -1.32118900 | 0.20361100  |
| H | -4.03657500 | 2.64125500  | -0.43030100 |
| N | 0.13875300  | -0.09958900 | -0.10891500 |
| C | 0.51505800  | 3.53946900  | 0.89043300  |
| H | -0.55320000 | 3.63246400  | 1.08174400  |
| H | 0.99783500  | 3.13667500  | 1.78580500  |
| H | 0.91953200  | 4.53449100  | 0.68621800  |
| O | 0.68315900  | 2.67476700  | -0.23673900 |
| H | 1.64720000  | 2.56808000  | -0.41584100 |
| C | 4.37593100  | 2.38642600  | 0.10225300  |
| H | 5.28922200  | 1.84774500  | -0.16570800 |
| H | 4.52377400  | 3.44483600  | -0.10884900 |
| H | 4.19514600  | 2.26463300  | 1.17460500  |
| O | 3.26556500  | 1.93782700  | -0.67767700 |
| H | 3.09347200  | 0.98344100  | -0.48478700 |
| H | -5.97490300 | 1.11359600  | -0.13550600 |

**S<sub>0</sub>-state PIP-2MeOH-PT (-858.75553252 a.u.):**

|   | <b>X</b>    | <b>Y</b>    | <b>Z</b>    |
|---|-------------|-------------|-------------|
| C | 1.13353500  | -0.93284400 | -0.11436900 |
| C | 0.62767500  | -2.25613500 | 0.08861700  |
| C | 1.51269000  | -3.31507700 | 0.19723400  |
| C | 2.88310300  | -3.03510000 | 0.10165600  |
| C | 3.32943900  | -1.74223200 | -0.09498800 |
| C | -0.98138800 | -0.86809300 | -0.04078700 |
| H | 1.16373400  | -4.32851700 | 0.35091200  |
| H | 3.61301700  | -3.82781200 | 0.18001700  |
| H | 4.37603900  | -1.48949100 | -0.17472900 |
| H | 0.38894700  | 1.72839400  | -0.13449900 |
| N | 2.46236800  | -0.70949400 | -0.20102000 |
| N | -0.73491900 | -2.17285400 | 0.13163700  |
| C | -2.34625500 | -0.32580900 | -0.07573900 |
| C | -3.42827400 | -1.12228000 | 0.32505100  |
| C | -2.59832100 | 0.98060400  | -0.51493100 |
| C | -4.72383400 | -0.62347600 | 0.29204200  |
| H | -3.23849000 | -2.13194800 | 0.66303600  |
| C | -3.89673600 | 1.47619600  | -0.54844500 |
| H | -1.77736900 | 1.60382800  | -0.84217900 |
| C | -4.96402300 | 0.67823700  | -0.14417500 |
| H | -5.54879600 | -1.25011900 | 0.60842700  |
| H | -4.07568200 | 2.48703100  | -0.89400300 |
| N | 0.12265100  | -0.06059000 | -0.19385900 |
| C | 0.30984600  | 3.30269000  | 1.08498300  |
| H | -0.77869000 | 3.35237100  | 1.17805200  |
| H | 0.71449400  | 2.77995900  | 1.95710000  |
| H | 0.70322500  | 4.31854400  | 1.07324100  |
| O | 0.69569000  | 2.67181800  | -0.13764900 |
| H | 2.39405500  | 2.36801600  | -0.44988700 |
| C | 4.29413800  | 2.56870200  | 0.11815100  |
| H | 5.22799700  | 2.05263000  | -0.10057200 |
| H | 4.39673500  | 3.61569500  | -0.17895600 |
| H | 4.10961900  | 2.52153500  | 1.19547800  |
| O | 3.25712100  | 1.92379300  | -0.62648800 |
| H | 2.82319700  | 0.25682800  | -0.35127000 |
| H | -5.97479400 | 1.06643900  | -0.17018500 |

**S<sub>1</sub>-state PIP-2MeOH-PT (-858.63014221 a.u.):**

|   | <b>X</b>   | <b>Y</b>    | <b>Z</b>    |
|---|------------|-------------|-------------|
| C | 1.07465300 | -0.94855500 | -0.10864100 |
| C | 0.52224200 | -2.26165900 | 0.12712100  |

|   |             |             |             |
|---|-------------|-------------|-------------|
| C | 1.38895700  | -3.38753700 | 0.25741900  |
| C | 2.75308600  | -3.13016100 | 0.14249500  |
| C | 3.25024200  | -1.84896700 | -0.08862600 |
| C | -1.04351600 | -0.79165500 | -0.01881500 |
| H | 1.00387800  | -4.38185700 | 0.43456900  |
| H | 3.47241500  | -3.93324200 | 0.23033700  |
| H | 4.30840900  | -1.65196300 | -0.17986500 |
| H | 0.46762000  | 1.74673500  | -0.09901200 |
| N | 2.43077700  | -0.76126100 | -0.21513000 |
| N | -0.80113200 | -2.15141500 | 0.18800500  |
| C | -2.34507900 | -0.25684100 | -0.07504200 |
| C | -3.48341900 | -1.09904400 | 0.15878900  |
| C | -2.58562800 | 1.12454700  | -0.37034700 |
| C | -4.75861700 | -0.58369300 | 0.10921300  |
| H | -3.31377700 | -2.14340700 | 0.37872000  |
| C | -3.86946600 | 1.61597800  | -0.41640300 |
| H | -1.74701800 | 1.77603600  | -0.57159300 |
| C | -4.97031400 | 0.77441600  | -0.17617700 |
| H | -5.60717100 | -1.23155200 | 0.29191300  |
| H | -4.03558600 | 2.66170100  | -0.64421100 |
| N | 0.11420600  | -0.04463800 | -0.19472300 |
| C | 0.53703300  | 3.25355200  | 1.20054700  |
| H | -0.53818600 | 3.32904000  | 1.38540700  |
| H | 0.99407700  | 2.67457500  | 2.00872500  |
| H | 0.96070300  | 4.25706000  | 1.20646300  |
| O | 0.80332100  | 2.67737900  | -0.08052600 |
| H | 2.48690000  | 2.33001100  | -0.49976100 |
| C | 4.41573700  | 2.48357400  | -0.03500800 |
| H | 5.32423500  | 1.94651100  | -0.30463300 |
| H | 4.52823900  | 3.52931700  | -0.33404800 |
| H | 4.28969900  | 2.43727500  | 1.05097600  |
| O | 3.32595100  | 1.86521600  | -0.72324900 |
| H | 2.82532400  | 0.17784300  | -0.39644200 |
| H | -5.97637300 | 1.17262200  | -0.21356200 |

**T<sub>1</sub>-state PIP-2MeOH-PT (-858.63150605 a.u.):**

|   | X           | Y           | Z           |
|---|-------------|-------------|-------------|
| C | 1.12761600  | -0.99131700 | -0.10889500 |
| C | 0.64715500  | -2.27677400 | 0.11560500  |
| C | 1.52024100  | -3.36337200 | 0.24006100  |
| C | 2.91112900  | -3.03118500 | 0.11241900  |
| C | 3.36473500  | -1.75323300 | -0.11051700 |
| C | -1.03450000 | -0.89186500 | -0.02422300 |



|   |             |             |             |
|---|-------------|-------------|-------------|
| H | 1.19434200  | -4.37632600 | 0.41799500  |
| H | 3.65181800  | -3.81624100 | 0.19428400  |
| H | 4.40789900  | -1.50024400 | -0.20719000 |
| H | 0.39568100  | 1.79168700  | -0.10026200 |
| N | 2.46570300  | -0.70333400 | -0.22368900 |
| N | -0.75703800 | -2.18649000 | 0.17513700  |
| C | -2.37322800 | -0.33514700 | -0.07068900 |
| C | -3.48387500 | -1.13765700 | 0.25580300  |
| C | -2.60640300 | 0.99946800  | -0.45142700 |
| C | -4.76972300 | -0.62114000 | 0.20770700  |
| H | -3.32029900 | -2.16610600 | 0.54844100  |
| C | -3.89794800 | 1.50858600  | -0.49602800 |
| H | -1.77569300 | 1.63428300  | -0.72739400 |
| C | -4.98793800 | 0.70572300  | -0.16654900 |
| H | -5.60959200 | -1.25517100 | 0.46550100  |
| H | -4.05415400 | 2.53814400  | -0.79472000 |
| N | 0.11137200  | -0.10829600 | -0.19206200 |
| C | 0.34935500  | 3.36614500  | 1.11316300  |
| H | -0.73706300 | 3.42090200  | 1.21975900  |
| H | 0.76717700  | 2.85225700  | 1.98341800  |
| H | 0.74786900  | 4.37880300  | 1.07790000  |
| O | 0.71592400  | 2.71859900  | -0.10993900 |
| H | 2.42448200  | 2.40334800  | -0.47130800 |
| C | 4.33334900  | 2.54523600  | 0.07291200  |
| H | 5.24974800  | 2.00808100  | -0.16754800 |
| H | 4.46086900  | 3.59457100  | -0.20568300 |
| H | 4.16088000  | 2.48220200  | 1.15140000  |
| O | 3.27028100  | 1.94206000  | -0.67049100 |
| H | 2.79968800  | 0.26465400  | -0.39056600 |
| H | -5.99332900 | 1.10591000  | -0.20233400 |
